# Supplementary material
Source: Springer Nature journal article supplement (https://www.springermedizin.de/resource/supplementary/12967_2010_671_MOESM7_ESM.pdf/9577074)

# Bilateral stenosis

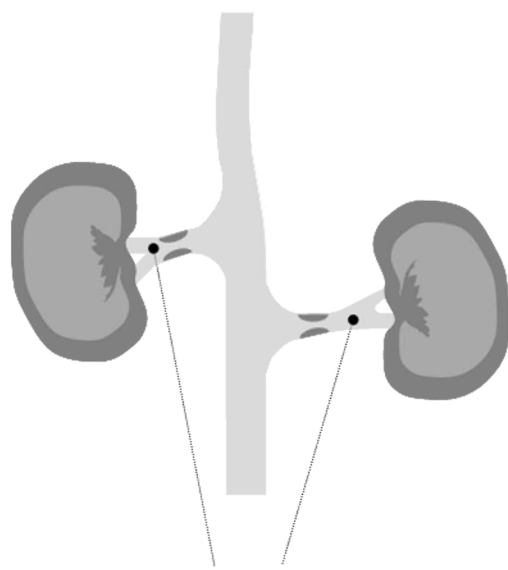

Diminished renal blood flow

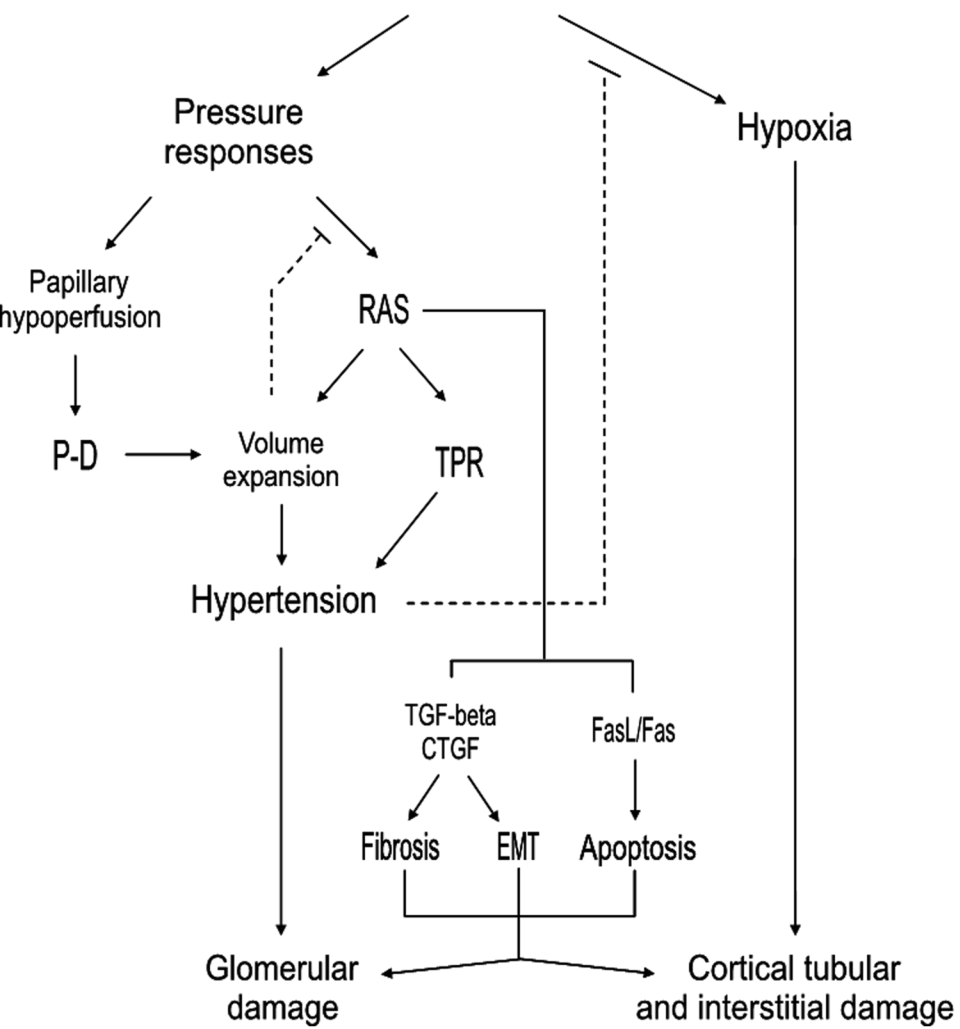

# Unilateral stenosis

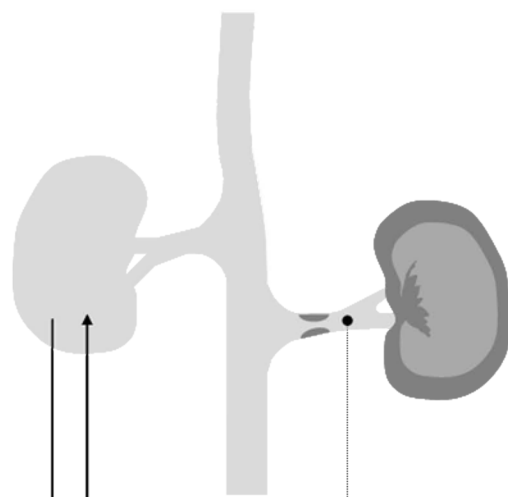

Diminished renal blood flow

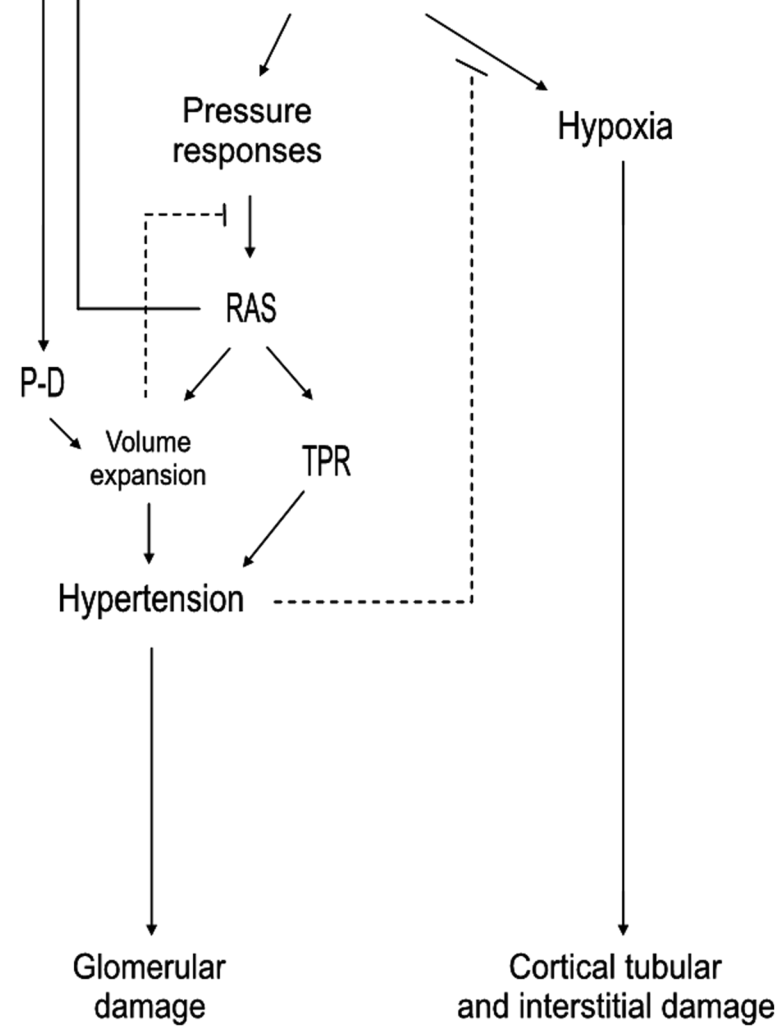

Supplement: MOESM7 [file 9577074]
